# Supplementary material for: The shark-tuna dichotomy: why tuna lay tiny eggs but sharks produce large offspring
Source: R Soc Open Sci. 2018 Aug 15;5(8):180453. doi: 10.1098/rsos.180453 (PMC6124039; doi:10.1098/rsos.180453)
Supplement: Data of Fig. 1 [file rsos180453supp1.xlsx]

## Sheet: Sheet1
Class	Order	Family	Genus	Species	Saltwater	Offspring wet weight, g	Adult wet weight, g
Actinopterygii	Anguilliformes	Congridae	Chiloconger	philippinensis	1	0.000321556	68.59
Actinopterygii	Anguilliformes	Congridae	Conger	oceanicus	1	0.00893987	121670
Actinopterygii	Anguilliformes	Congridae	Gnathophis	mystax	1	0.0108892	2160
Actinopterygii	Anguilliformes	Derichthyidae	Derichthys	serpentinus	1	0.00637064	640
Actinopterygii	Anguilliformes	Muraenidae	Gymnothorax	griseus	1	0.0141372	2746.25
Actinopterygii	Anguilliformes	Nettastomatidae	Facciolella	equatorialis	1	0.000321556	7290
Actinopterygii	Anguilliformes	Ophichthidae	Apterichtus	anguiformis	1	0.0188166	1198.23
Actinopterygii	Anguilliformes	Ophichthidae	Apterichtus	caecus	1	0.0188166	2160
Actinopterygii	Anguilliformes	Ophichthidae	Dalophis	imberbis	1	0.00679521	33750
Actinopterygii	Anguilliformes	Ophichthidae	Ophichthus	cephalozona	1	0.0108892	15208.8
Actinopterygii	Anguilliformes	Ophichthidae	Ophichthus	rufus	1	0.00637064	2160
Actinopterygii	Anguilliformes	Synaphobranchidae	Histiobranchus	bathybius	1	0.000696912	25713.5
Actinopterygii	Atheriniformes	Atherinidae	Atherion	elymus	1	9.44376e-05	1.25
Actinopterygii	Atheriniformes	Atherinopsidae	Atherinopsis	californiensis	1	0.00557529	911.25
Actinopterygii	Atheriniformes	Atherinopsidae	Leuresthes	tenuis	1	0.00331524	68.59
Actinopterygii	Atheriniformes	Atherinopsidae	Membras	vagrans	1	0.000448922
Actinopterygii	Aulopiformes	Aulopidae	Hime	japonica	1	0.0010474	110.896
Actinopterygii	Aulopiformes	Notosudidae	Ahliesaurus	brevis	1	0.000113098	92.61
Actinopterygii	Aulopiformes	Synodontidae	Synodus	lucioceps	1	0.00128825	2621.44
Actinopterygii	Batrachoidiformes	Batrachoididae	Amphichthys	cryptocentrus	1	0.113098	640
Actinopterygii	Batrachoidiformes	Batrachoididae	Porichthys	notatus	1	0.113098	548.72
Actinopterygii	Batrachoidiformes	Batrachoididae	Sanopus	barbatus	1	0.113098	689.21
Actinopterygii	Beloniformes	Belonidae	Tylosurus	acus acus	1	0.0244291	35815.8
Actinopterygii	Beloniformes	Belonidae	Tylosurus	crocodilus	1	0.0244291	33750
Actinopterygii	Beloniformes	Exocoetidae	Cheilopogon	pinnatibarbatus californicus	1	0.00228851	548.72
Actinopterygii	Beloniformes	Exocoetidae	Exocoetus	volitans	1	0.00679522	270
Actinopterygii	Beloniformes	Exocoetidae	Hirundichthys	coromandelensis	1	0.00331524	68.59
Actinopterygii	Beloniformes	Exocoetidae	Parexocoetus	mento	1	0.00287895	13.31
Actinopterygii	Beloniformes	Hemiramphidae	Oxyporhamphus	micropterus	1	0.00388243	63.3163
Actinopterygii	Beryciformes	Berycidae	Beryx	splendens	1	0.000659585	3430
Actinopterygii	Beryciformes	Trachichthyidae	Hoplostethus	atlanticus	1	0.00596413	4218.75
Actinopterygii	Clupeiformes	Clupeidae	Clupea	bentincki	1	0.000463248	228.821
Actinopterygii	Clupeiformes	Clupeidae	Ethmidium	maculatum	1	0.00115035	175.76
Actinopterygii	Clupeiformes	Clupeidae	Opisthonema	libertate	1	0.00214467	270
Actinopterygii	Clupeiformes	Clupeidae	Sardinella	longiceps	1	0.00143676	121.67
Actinopterygii	Clupeiformes	Clupeidae	Sardinops	sagax	1	0.00254982	616.299
Actinopterygii	Clupeiformes	Dussumieriidae	Etrumeus	sadina	1	0.00143676	359.37
Actinopterygii	Clupeiformes	Dussumieriidae	Etrumeus	whiteheadi	1	0.00136116	106.48
Actinopterygii	Cyprinodontiformes	Fundulidae	Fundulus	similis	1	0.0108892	17.28
Actinopterygii	Gadiformes	Bregmacerotidae	Bregmaceros	atlanticus	1	0.000696912	3.00763
Actinopterygii	Gadiformes	Bregmacerotidae	Bregmaceros	bathymaster	1	0.000407721	10
Actinopterygii	Gadiformes	Gadidae	Gadus	macrocephalus	1	0.000696912	16851.6
Actinopterygii	Gadiformes	Gadidae	Melanogrammus	aeglefinus	1	0.00139107	14049.3
Actinopterygii	Gadiformes	Gadidae	Micromesistius	poutassou	1	0.000817285	1250
Actinopterygii	Gadiformes	Gadidae	Pollachius	pollachius	1	0.000817285	21970
Actinopterygii	Gadiformes	Gadidae	Pollachius	virens	1	0.000716092	21970
Actinopterygii	Gadiformes	Gadidae	Trisopterus	esmarkii	1	0.000775736	428.75
Actinopterygii	Gadiformes	Gadidae	Trisopterus	minutus	1	0.000588979	640
Actinopterygii	Gadiformes	Lotidae	Brosme	brosme	1	0.00123184	17280
Actinopterygii	Gadiformes	Lotidae	Ciliata	mustela	1	0.000288696	156.25
Actinopterygii	Gadiformes	Lotidae	Enchelyopus	cimbrius	1	0.000288696	689.21
Actinopterygii	Gadiformes	Lotidae	Molva	molva	1	0.000606132	80000
Actinopterygii	Gadiformes	Macrouridae	Hymenocephalus	italicus	1	0.000597515	156.25
Actinopterygii	Gadiformes	Macrouridae	Macrourus	berglax	1	0.00176715	13310
Actinopterygii	Gadiformes	Merlucciidae	Merluccius	bilinearis	1	0.000421161	4389.76
Actinopterygii	Gadiformes	Merlucciidae	Merluccius	merluccius	1	0.000477876	27440
Actinopterygii	Gadiformes	Muraenolepididae	Muraenolepis	microps	1	0.000229848	428.75
Actinopterygii	Gadiformes	Phycidae	Phycis	blennoides	1	0.00031034	13310
Actinopterygii	Gadiformes	Phycidae	Urophycis	chuss	1	3.31524e-06	2874.96
Actinopterygii	Gobiesociformes	Gobiesocidae	Diplecogaster	bimaculata	1	0.00159626	2.16
Actinopterygii	Gobiesociformes	Gobiesocidae	Lepadogaster	candolii	1	0.000904781	4.21875
Actinopterygii	Gobiesociformes	Gobiesocidae	Lepadogaster	lepadogaster	1	0.00331524	2.74625
Actinopterygii	Gobiesociformes	Gobiesocidae	Tomicodon	briggsi	1	1.76715e-06	0.0517772
Actinopterygii	Gobiesociformes	Gobiesocidae	Tomicodon	clarkei	1	3.35104e-05	0.0280322
Actinopterygii	Gobiesociformes	Gobiesocidae	Tomicodon	cryptus	1	0.000113098	0.06859
Actinopterygii	Gobiesociformes	Gobiesocidae	Tomicodon	fasciatus	1	3.35104e-05	1.32651
Actinopterygii	Gobiesociformes	Gobiesocidae	Tomicodon	lavettsmithi	1	1.41372e-05	0.190342
Actinopterygii	Gobiesociformes	Gobiesocidae	Tomicodon	leurodiscus	1	1.41372e-05	0.0730138
Actinopterygii	Gobiesociformes	Gobiesocidae	Tomicodon	reitzae	1	6.545e-05	0.42875
Actinopterygii	Gobiesociformes	Gobiesocidae	Tomicodon	rhabdotus	1	3.35104e-05	0.566231
Actinopterygii	Gobiesociformes	Gobiesocidae	Tomicodon	rupestris	1	6.545e-05	0.203464
Actinopterygii	Lampriformes	Lampridae	Lampris	guttatus	1	0.000229848	80000
Actinopterygii	Lampriformes	Lophotidae	Lophotus	lacepede	1	0.00868201	80000
Actinopterygii	Lampriformes	Regalecidae	Regalecus	glesne	1	0.00818125	5120000
Actinopterygii	Lampriformes	Regalecidae	Regalecus	russelii	1	0.0298801	5120000
Actinopterygii	Lampriformes	Trachipteridae	Desmodema	lorum	1	0.00770013	14815.4
Actinopterygii	Lampriformes	Trachipteridae	Trachipterus	altivelis	1	0.0124427	61284.9
Actinopterygii	Lampriformes	Trachipteridae	Trachipterus	fukuzakii	1	0.00451088	29242.1
Actinopterygii	Lampriformes	Trachipteridae	Trachipterus	ishikawae	1	0.0073291	196830
Actinopterygii	Lampriformes	Trachipteridae	Zu	cristatus	1	0.0041888	16430.3
Actinopterygii	Lophiiformes	Antennariidae	Lophiocharon	trisignatus	1	0.0205796	31.7652
Actinopterygii	Lophiiformes	Lophiidae	Lophius	piscatorius	1	0.010306	80000
Actinopterygii	Myctophiformes	Myctophidae	Benthosema	glaciale	1	6.545e-05	10.9273
Actinopterygii	Ophidiiformes	Bythitidae	Dinematichthys	iluocoeteoides	1	0.0005236	17.28
Actinopterygii	Ophidiiformes	Carapidae	Echiodon	drummondii	1	0.00109807	270
Actinopterygii	Osmeriformes	Alepocephalidae	Bathylaco	nigricans	1	0.010306	466.56
Actinopterygii	Osmeriformes	Argentinidae	Argentina	sphyraena	1	0.00266431	428.75
Actinopterygii	Osmeriformes	Bathylagidae	Bathylagoides	nigrigenys	1	0.000463248	11.5762
Actinopterygii	Osmeriformes	Bathylagidae	Bathylagoides	wesethi	1	0.0005236	24.6038
Actinopterygii	Osmeriformes	Bathylagidae	Bathylagus	antarcticus	1	0.0041888	37.2388
Actinopterygii	Osmeriformes	Bathylagidae	Bathylagus	pacificus	1	0.00176715	156.25
Actinopterygii	Osmeriformes	Bathylagidae	Leuroglossus	schmidti	1	0.00292816	80
Actinopterygii	Osmeriformes	Bathylagidae	Leuroglossus	stilbius	1	0.000696912	33.75
Actinopterygii	Osmeriformes	Bathylagidae	Lipolagus	ochotensis	1	0.000539466	51.7772
Actinopterygii	Osmeriformes	Microstomatidae	Nansenia	candida	1	0.00168026	80.7222
Actinopterygii	Osmeriformes	Microstomatidae	Nansenia	crassa	1	0.000904781	188.211
Actinopterygii	Osmeriformes	Opisthoproctidae	Dolichopteryx	minuscula	1	0.00123184	2.11709
Actinopterygii	Osmeriformes	Opisthoproctidae	Dolichopteryx	rostrata	1	0.00123184	2.90118
Actinopterygii	Perciformes	Acanthuridae	Acanthurus	triostegus	1	0.000164637	196.83
Actinopterygii	Perciformes	Anarhichadidae	Anarhichas	lupus	1	0.113098	33750
Actinopterygii	Perciformes	Apogonidae	Apogon	maculatus	1	7.23825e-06	13.6763
Actinopterygii	Perciformes	Apogonidae	Ostorhinchus	notatus	1	0.000367879	10
Actinopterygii	Perciformes	Apogonidae	Paroncheilus	affinis	1	0.000179595	13.31
Actinopterygii	Perciformes	Apogonidae	Phaeoptyx	conklini	1	7.23825e-06	7.29
Actinopterygii	Perciformes	Apogonidae	Pterapogon	kauderni	1	0.0108892	6.36056
Actinopterygii	Perciformes	Artedidraconidae	Artedidraco	lonnbergi	1	0.0155986	13.31
Actinopterygii	Perciformes	Artedidraconidae	Artedidraco	mirus	1	0.00818125	19.5312
Actinopterygii	Perciformes	Artedidraconidae	Artedidraco	shackletoni	1	0.0124427	31.1214
Actinopterygii	Perciformes	Artedidraconidae	Artedidraco	skottsbergi	1	0.0108892	10
Actinopterygii	Perciformes	Artedidraconidae	Pogonophryne	ventrimaculata	1	0.00379352	175.76
Actinopterygii	Perciformes	Bathydraconidae	Akarotaxis	nudiceps	1	0.00604401	21.97
Actinopterygii	Perciformes	Bathydraconidae	Cygnodraco	mawsoni	1	0.0133738	689.21
Actinopterygii	Perciformes	Bathydraconidae	Gerlachea	australis	1	0.0141372	138.24
Actinopterygii	Perciformes	Bathydraconidae	Parachaenichthys	charcoti	1	0.0171573	740.88
Actinopterygii	Perciformes	Bathydraconidae	Parachaenichthys	georgianus	1	0.0116177	2053.79
Actinopterygii	Perciformes	Bathydraconidae	Prionodraco	evansii	1	0.0265219	33.75
Actinopterygii	Perciformes	Bathydraconidae	Psilodraco	breviceps	1	0.000143794	80
Actinopterygii	Perciformes	Bathydraconidae	Racovitzia	glacialis	1	0.0147103	138.24
Actinopterygii	Perciformes	Bathymasteridae	Bathymaster	derjugini	1	2.24494e-05	58.32
Actinopterygii	Perciformes	Blenniidae	Blennius	ocellaris	1	0.000817285	80
Actinopterygii	Perciformes	Blenniidae	Entomacrodus	chiostictus	1	0.000157479	4.21875
Actinopterygii	Perciformes	Blenniidae	Hypsoblennius	brevipinnis	1	8.47596e-05	17.28
Actinopterygii	Perciformes	Blenniidae	Hypsoblennius	jenkinsi	1	0.000216505	21.97
Actinopterygii	Perciformes	Blenniidae	Lipophrys	pholis	1	0.00143676	1.68197
Actinopterygii	Perciformes	Blenniidae	Parablennius	gattorugine	1	0.00214467	270
Actinopterygii	Perciformes	Blenniidae	Plagiotremus	azaleus	1	0.000104826	10
Actinopterygii	Perciformes	Bramidae	Brama	brama	1	0.00214467	10000
Actinopterygii	Perciformes	Bramidae	Brama	dussumieri	1	0.00159626	113.906
Actinopterygii	Perciformes	Bramidae	Eumegistus	brevorti	1	0.000140501	2269.81
Actinopterygii	Perciformes	Caesionidae	Caesio	caerulaurea	1	0.000288696	428.75
Actinopterygii	Perciformes	Caesionidae	Caesio	teres	1	0.000243728	640
Actinopterygii	Perciformes	Caesionidae	Pterocaesio	digramma	1	0.00031034	270
Actinopterygii	Perciformes	Callionymidae	Callionymus	lyra	1	0.000299388	213.692
Actinopterygii	Perciformes	Caproidae	Capros	aper	1	0.0005236	270
Actinopterygii	Perciformes	Carangidae	Decapterus	macrosoma	1	0.000179595	428.75
Actinopterygii	Perciformes	Carangidae	Decapterus	russelli	1	0.000375378	911.25
Actinopterygii	Perciformes	Carangidae	Seriola	dumerili	1	0.00140619	68590
Actinopterygii	Perciformes	Carangidae	Trachurus	symmetricus	1	0.000508049	5314.41
Actinopterygii	Perciformes	Carangidae	Trachurus	trachurus	1	0.000381704	3430
Actinopterygii	Perciformes	Cepolidae	Cepola	macrophthalma	1	0.000195433	5120
Actinopterygii	Perciformes	Channichthyidae	Chaenocephalus	aceratus	1	0.0298801	3732.48
Actinopterygii	Perciformes	Channichthyidae	Chaenodraco	wilsoni	1	0.0543617	795.07
Actinopterygii	Perciformes	Channichthyidae	Champsocephalus	gunnari	1	0.0265219	2874.96
Actinopterygii	Perciformes	Channichthyidae	Channichthys	rhinoceratus	1	0.047713	2160
Actinopterygii	Perciformes	Channichthyidae	Channichthys	rugosus	1	0.0224493	0.27
Actinopterygii	Perciformes	Channichthyidae	Chionobathyscus	dewitti	1	0.0234253	2160
Actinopterygii	Perciformes	Channichthyidae	Chionodraco	hamatus	1	0.043099	1176.49
Actinopterygii	Perciformes	Channichthyidae	Chionodraco	myersi	1	0.025671	548.72
Actinopterygii	Perciformes	Channichthyidae	Chionodraco	rastrospinosus	1	0.061601	1406.08
Actinopterygii	Perciformes	Channichthyidae	Cryodraco	antarcticus	1	0.0290726	606.985
Actinopterygii	Perciformes	Channichthyidae	Neopagetopsis	ionah	1	0.0335104	1756.16
Actinopterygii	Perciformes	Channichthyidae	Pagetopsis	macropterus	1	0.0335104	359.37
Actinopterygii	Perciformes	Channichthyidae	Pagetopsis	maculatus	1	0.0493212	156.25
Actinopterygii	Perciformes	Channichthyidae	Pseudochaenichthys	georgianus	1	0.0179742	2160
Actinopterygii	Perciformes	Cheilodactylidae	Nemadactylus	macropterus	1	0.000448922	3430
Actinopterygii	Perciformes	Cirrhitidae	Oxycirrhites	typus	1	0.000172007	21.97
Actinopterygii	Perciformes	Clinidae	Heterostichus	rostratus	1	0.00136116	2269.81
Actinopterygii	Perciformes	Dactyloscopidae	Dactyloscopus	metoecus	1	0.000268083	0.21952
Actinopterygii	Perciformes	Echeneidae	Remora	osteochir	1	0.000927589	640
Actinopterygii	Perciformes	Epigonidae	Epigonus	lifouensis	1	3.35104e-05	50.0899
Actinopterygii	Perciformes	Gerreidae	Gerres	oblongus	1	0.000164637	270
Actinopterygii	Perciformes	Gobiidae	Eviota	sigillata	1	0.000143794	0.27
Actinopterygii	Perciformes	Gobiidae	Pomatoschistus	pictus	1	0.000248475	2.16
Actinopterygii	Perciformes	Gobiidae	Pterogobius	zacalles	1	0.000179595	42.5153
Actinopterygii	Perciformes	Gobiidae	Sueviota	lachneri	1	0.000113098	0.09261
Actinopterygii	Perciformes	Gobiidae	Trimmatom	nanus	1	8.18125e-06	0.01
Actinopterygii	Perciformes	Gobiidae	Valenciennea	strigata	1	3.10594e-05	58.32
Actinopterygii	Perciformes	Grammatidae	Gramma	loreto	1	0.000492808	5.12
Actinopterygii	Perciformes	Harpagiferidae	Harpagifer	antarcticus	1	0.00723825	8.57375
Actinopterygii	Perciformes	Icosteidae	Icosteus	aenigmaticus	1	0.0127701	96636
Actinopterygii	Perciformes	Istiophoridae	Istiophorus	platypterus	1	0.000654104	421442
Actinopterygii	Perciformes	Istiophoridae	Kajikia	audax	1	0.0005236	740880
Actinopterygii	Perciformes	Istiophoridae	Makaira	mazara	1	0.00079633	1250000
Actinopterygii	Perciformes	Istiophoridae	Makaira	nigricans	1	0.0005236	1250000
Actinopterygii	Perciformes	Labridae	Coris	julis	1	0.000137259	270
Actinopterygii	Perciformes	Labridae	Ctenolabrus	rupestris	1	0.000333039	58.32
Actinopterygii	Perciformes	Labridae	Labrus	bergylta	1	0.0005236	2861.91
Actinopterygii	Perciformes	Labridae	Lachnolaimus	maximus	1	0.000904781	7535.71
Actinopterygii	Perciformes	Labridae	Symphodus	melops	1	0.000299388	219.52
Actinopterygii	Perciformes	Labridae	Tautogolabrus	adspersus	1	0.000350771	548.72
Actinopterygii	Perciformes	Labrisomidae	Labrisomus	nuchipinnis	1	0.0005236	121.67
Actinopterygii	Perciformes	Latridae	Latridopsis	ciliaris	1	0.000570487	5120
Actinopterygii	Perciformes	Latridae	Latridopsis	forsteri	1	0.000595801	2746.25
Actinopterygii	Perciformes	Latridae	Latris	lineata	1	0.0011771	17280
Actinopterygii	Perciformes	Leptoscopidae	Leptoscopus	macropygus	1	0.000606132	49.13
Actinopterygii	Perciformes	Lutjanidae	Lutjanus	campechanus	1	0.000268083	10000
Actinopterygii	Perciformes	Lutjanidae	Lutjanus	kasmira	1	0.000283447	640
Actinopterygii	Perciformes	Lutjanidae	Lutjanus	synagris	1	0.000195433	2160
Actinopterygii	Perciformes	Mullidae	Mullus	surmuletus	1	0.000344792	640
Actinopterygii	Perciformes	Nemipteridae	Nemipterus	virgatus	1	0.000220894	428.75
Actinopterygii	Perciformes	Nototheniidae	Dissostichus	eleginoides	1	0.047713	99383.8
Actinopterygii	Perciformes	Nototheniidae	Dissostichus	mawsoni	1	0.0374235	80000
Actinopterygii	Perciformes	Nototheniidae	Gobionotothen	acuta	1	0.00143676	428.75
Actinopterygii	Perciformes	Nototheniidae	Gobionotothen	angustifrons	1	0.00214467	86.1513
Actinopterygii	Perciformes	Nototheniidae	Gobionotothen	gibberifrons	1	0.000268083	1663.75
Actinopterygii	Perciformes	Nototheniidae	Lepidonotothen	squamifrons	1	0.000508049	1663.75
Actinopterygii	Perciformes	Nototheniidae	Lindbergichthys	mizops	1	0.00406439	33.75
Actinopterygii	Perciformes	Nototheniidae	Lindbergichthys	nudifrons	1	0.00596413	74.1488
Actinopterygii	Perciformes	Nototheniidae	Notothenia	cyanobrancha	1	0.00159626	270
Actinopterygii	Perciformes	Nototheniidae	Notothenia	neglecta	1	0.0134421	911.25
Actinopterygii	Perciformes	Nototheniidae	Notothenia	rossii	1	0.0561152	7786.88
Actinopterygii	Perciformes	Nototheniidae	Nototheniops	larseni	1	0.00305364	138.24
Actinopterygii	Perciformes	Nototheniidae	Nototheniops	tchizh	1	0.00557529
Actinopterygii	Perciformes	Nototheniidae	Pagothenia	borchgrevinki	1	0.0171573	219.52
Actinopterygii	Perciformes	Nototheniidae	Paranotothenia	magellanica	1	0.000268083	548.72
Actinopterygii	Perciformes	Nototheniidae	Patagonotothen	guntheri	1	0.000696912	121.67
Actinopterygii	Perciformes	Nototheniidae	Pleuragramma	antarctica	1	0.00280617	156.25
Actinopterygii	Perciformes	Nototheniidae	Trematomus	bernacchii	1	0.0298801	312.559
Actinopterygii	Perciformes	Nototheniidae	Trematomus	eulepidotus	1	0.0446023	393.04
Actinopterygii	Perciformes	Nototheniidae	Trematomus	hansoni	1	0.0224493	689.21
Actinopterygii	Perciformes	Nototheniidae	Trematomus	lepidorhinus	1	0.000775736	297.91
Actinopterygii	Perciformes	Nototheniidae	Trematomus	loennbergii	1	0.0147103	270
Actinopterygii	Perciformes	Nototheniidae	Trematomus	newnesi	1	0.00818125	80
Actinopterygii	Perciformes	Nototheniidae	Trematomus	nicolai	1	0.00228851	466.56
Actinopterygii	Perciformes	Nototheniidae	Trematomus	pennellii	1	0.0110684	138.24
Actinopterygii	Perciformes	Nototheniidae	Trematomus	scotti	1	0.00818125	40.96
Actinopterygii	Perciformes	Nototheniidae	Trematomus	tokarevi	1	0.028731	112.394
Actinopterygii	Perciformes	Opistognathidae	Stalix	toyoshio	1	0.000143794	0.806216
Actinopterygii	Perciformes	Pomacentridae	Abudefduf	saxatilis	1	0.0005236	120.09
Actinopterygii	Perciformes	Pomacentridae	Dascyllus	aruanus	1	0.000220894	10
Actinopterygii	Perciformes	Scombridae	Katsuwonus	pelamis	1	0.0005236	13310
Actinopterygii	Perciformes	Scombridae	Sarda	orientalis	1	0.00115035	10612.1
Actinopterygii	Perciformes	Scombridae	Scomber	japonicus	1	0.000696912	2621.44
Actinopterygii	Perciformes	Scombridae	Thunnus	maccoyii	1	0.000220894	147061
Actinopterygii	Perciformes	Serranidae	Cephalopholis	fulva	1	0.000448922	689.21
Actinopterygii	Perciformes	Serranidae	Epinephelus	polyphekadion	1	0.000229848	7290
Actinopterygii	Perciformes	Serranidae	Epinephelus	tauvina	1	0.000220894	10000
Actinopterygii	Perciformes	Serranidae	Plectropomus	leopardus	1	0.000350771	17280
Actinopterygii	Perciformes	Serranidae	Serranus	cabrilla	1	0.00039457	640
Actinopterygii	Perciformes	Siganidae	Siganus	luridus	1	9.44376e-05	270
Actinopterygii	Perciformes	Sparidae	Pagellus	bogaraveo	1	0.000882349	3430
Actinopterygii	Perciformes	Sparidae	Pagellus	erythrinus	1	1.96849e-05	2160
Actinopterygii	Perciformes	Sparidae	Spondyliosoma	cantharus	1	0.000678077	2160
Actinopterygii	Perciformes	Sparidae	Stenotomus	chrysops	1	0.000350771	973.36
Actinopterygii	Perciformes	Stichaeidae	Chirolophis	ascanii	1	0.00868201	99.3838
Actinopterygii	Perciformes	Trachinidae	Echiichthys	vipera	1	0.000904781	33.75
Actinopterygii	Perciformes	Trachinidae	Trachinus	draco	1	0.0005236	1488.77
Actinopterygii	Perciformes	Trichodontidae	Arctoscopus	japonicus	1	0.0205796	270
Actinopterygii	Perciformes	Trichodontidae	Trichodon	trichodon	1	0.0205796	283.726
Actinopterygii	Perciformes	Uranoscopidae	Uranoscopus	scaber	1	0.0041888	640
Actinopterygii	Perciformes	Xiphiidae	Xiphias	gladius	1	0.00257245	941964
Actinopterygii	Perciformes	Zoarcidae	Lycodes	esmarkii	1	0.113098	4218.75
Actinopterygii	Pleuronectiformes	Bothidae	Arnoglossus	imperialis	1	0.000225341	156.25
Actinopterygii	Pleuronectiformes	Bothidae	Arnoglossus	laterna	1	0.000164637	156.25
Actinopterygii	Pleuronectiformes	Bothidae	Arnoglossus	thori	1	0.000195433	58.32
Actinopterygii	Pleuronectiformes	Cynoglossidae	Symphurus	atricaudus	1	0.000268083	92.61
Actinopterygii	Pleuronectiformes	Paralichthyidae	Hippoglossina	oblonga	1	0.000547517	689.21
Actinopterygii	Pleuronectiformes	Paralichthyidae	Paralichthys	olivaceus	1	0.00134636	10927.3
Actinopterygii	Pleuronectiformes	Pleuronectidae	Acanthopsetta	nadeshnyi	1	0.000407721	973.36
Actinopterygii	Pleuronectiformes	Pleuronectidae	Glyptocephalus	cynoglossus	1	0.000817285	2160
Actinopterygii	Pleuronectiformes	Pleuronectidae	Glyptocephalus	zachirus	1	0.00359137	2160
Actinopterygii	Pleuronectiformes	Pleuronectidae	Hippoglossoides	elassodon	1	0.0179742	1406.08
Actinopterygii	Pleuronectiformes	Pleuronectidae	Hippoglossoides	platessoides	1	0.00425195	5635.6
Actinopterygii	Pleuronectiformes	Pleuronectidae	Hippoglossus	hippoglossus	1	0.0205796	570666
Actinopterygii	Pleuronectiformes	Pleuronectidae	Isopsetta	isolepis	1	0.000441871	1663.75
Actinopterygii	Pleuronectiformes	Pleuronectidae	Lepidopsetta	bilineata	1	0.000614833	2053.79
Actinopterygii	Pleuronectiformes	Pleuronectidae	Limanda	ferruginea	1	0.000381704	2621.44
Actinopterygii	Pleuronectiformes	Pleuronectidae	Limanda	limanda	1	0.000492808	640
Actinopterygii	Pleuronectiformes	Pleuronectidae	Microstomus	kitt	1	0.00112401	2746.25
Actinopterygii	Pleuronectiformes	Pleuronectidae	Pleuronichthys	decurrens	1	0.00156346	506.53
Actinopterygii	Pleuronectiformes	Pleuronectidae	Pseudopleuronectes	americanus	1	0.000263088	2621.44
Actinopterygii	Pleuronectiformes	Scophthalmidae	Lepidorhombus	whiffiagonis	1	0.000696912	2160
Actinopterygii	Pleuronectiformes	Scophthalmidae	Scophthalmus	aquosus	1	0.000696912	954.44
Actinopterygii	Pleuronectiformes	Scophthalmidae	Zeugopterus	punctatus	1	0.0005236	156.25
Actinopterygii	Pleuronectiformes	Soleidae	Buglossidium	luteum	1	0.00031034	44.1094
Actinopterygii	Pleuronectiformes	Soleidae	Microchirus	variegatus	1	0.000904781	428.75
Actinopterygii	Pleuronectiformes	Soleidae	Solea	ovata	1	0.000439071	10
Actinopterygii	Scorpaeniformes	Agonidae	Agonus	cataphractus	1	0.0041888	92.61
Actinopterygii	Scorpaeniformes	Agonidae	Leptagonus	decagonus	1	0.00359137	92.61
Actinopterygii	Scorpaeniformes	Agonidae	Podothecus	sachi	1	0.00271105	1250
Actinopterygii	Scorpaeniformes	Anoplopomatidae	Anoplopoma	fimbria	1	0.0041888	17280
Actinopterygii	Scorpaeniformes	Cottidae	Hemilepidotus	hemilepidotus	1	0.00194982	1326.51
Actinopterygii	Scorpaeniformes	Cyclopteridae	Cyclopterus	lumpus	1	0.00723825	1402.03
Actinopterygii	Scorpaeniformes	Cyclopteridae	Eumicrotremus	orbis	1	0.0041888	58.32
Actinopterygii	Scorpaeniformes	Hemitripteridae	Hemitripterus	villosus	1	0.0446023	428.75
Actinopterygii	Scorpaeniformes	Liparidae	Careproctus	ranula	1	0.0141372	5.31441
Actinopterygii	Scorpaeniformes	Liparidae	Eutelichthys	leptochirus	1	0.0041888	1.32651
Actinopterygii	Scorpaeniformes	Liparidae	Liparis	gibbus	1	0.00148344	1406.08
Actinopterygii	Scorpaeniformes	Liparidae	Liparis	liparis	1	0.00176715	33.75
Actinopterygii	Scorpaeniformes	Liparidae	Liparis	montagui	1	0.000716092	17.28
Actinopterygii	Scorpaeniformes	Liparidae	Paraliparis	calidus	1	0.0171573	28.6329
Actinopterygii	Scorpaeniformes	Sebastidae	Helicolenus	dactylopterus	1	0.000463248	1250
Actinopterygii	Scorpaeniformes	Triglidae	Chelidonichthys	cuculus	1	0.00149922	1250
Actinopterygii	Scorpaeniformes	Triglidae	Chelidonichthys	lucerna	1	0.00131709	4235.65
Actinopterygii	Scorpaeniformes	Triglidae	Lepidotrigla	modesta	1	0.00115035	106.48
Actinopterygii	Scorpaeniformes	Triglidae	Lepidotrigla	mulhalli	1	0.00115035	80
Actinopterygii	Scorpaeniformes	Triglidae	Lepidotrigla	papilio	1	0.00115035	80
Actinopterygii	Scorpaeniformes	Triglidae	Lepidotrigla	vanessa	1	0.00115035	219.52
Actinopterygii	Stomiiformes	Gonostomatidae	Cyclothone	atraria	1	7.36223e-05	2.38328
Actinopterygii	Stomiiformes	Gonostomatidae	Cyclothone	braueri	1	6.545e-05	0.32768
Actinopterygii	Stomiiformes	Gonostomatidae	Cyclothone	microdon	1	6.545e-05	4.38976
Actinopterygii	Stomiiformes	Gonostomatidae	Cyclothone	pseudopallida	1	7.7952e-05	1.40608
Actinopterygii	Stomiiformes	Gonostomatidae	Gonostoma	denudatum	1	0.000273141	27.44
Actinopterygii	Stomiiformes	Phosichthyidae	Ichthyococcus	ovatus	1	0.000268083	1.66375
Actinopterygii	Stomiiformes	Phosichthyidae	Vinciguerria	attenuata	1	0.000356819	0.91125
Actinopterygii	Stomiiformes	Phosichthyidae	Vinciguerria	lucetia	1	0.000150533	5.12
Actinopterygii	Stomiiformes	Phosichthyidae	Vinciguerria	nimbaria	1	0.000164637	1.50569
Actinopterygii	Stomiiformes	Phosichthyidae	Vinciguerria	poweriae	1	0.000268083	0.79507
Actinopterygii	Stomiiformes	Sternoptychidae	Argyropelecus	affinis	1	0.000492808	5.92704
Actinopterygii	Stomiiformes	Sternoptychidae	Argyropelecus	hemigymnus	1	0.0005236	0.59319
Actinopterygii	Stomiiformes	Sternoptychidae	Maurolicus	muelleri	1	0.00168026	5.12
Actinopterygii	Stomiiformes	Stomiidae	Chauliodus	macouni	1	0.0134421	251.538
Actinopterygii	Stomiiformes	Stomiidae	Stomias	atriventer	1	0.000381704	156.25
Actinopterygii	Stomiiformes	Stomiidae	Tactostoma	macropus	1	0.00164631	403.536
Actinopterygii	Syngnathiformes	Fistulariidae	Fistularia	commersonii	1	0.00359137	40960
Actinopterygii	Syngnathiformes	Syngnathidae	Hippocampus	breviceps	1	0.00214467	33.75
Actinopterygii	Syngnathiformes	Syngnathidae	Hippocampus	comes	1	0.00143676	65.392
Actinopterygii	Syngnathiformes	Syngnathidae	Hippocampus	erectus	1	0.00176715	68.59
Actinopterygii	Syngnathiformes	Syngnathidae	Hippocampus	fuscus	1	0.00305363	29.8598
Actinopterygii	Syngnathiformes	Syngnathidae	Hippocampus	hippocampus	1	0.00214467	33.75
Actinopterygii	Syngnathiformes	Syngnathidae	Hippocampus	trimaculatus	1	0.000381704	106.48
Actinopterygii	Syngnathiformes	Syngnathidae	Hippocampus	whitei	1	0.00305363	21.97
Actinopterygii	Syngnathiformes	Syngnathidae	Hippocampus	zosterae	1	0.00115035	1.25
Actinopterygii	Syngnathiformes	Syngnathidae	Nerophis	lumbriciformis	1	0.00115035	40.96
Actinopterygii	Syngnathiformes	Syngnathidae	Syngnathus	phlegon	1	0.00128825	80
Actinopterygii	Tetraodontiformes	Balistidae	Balistes	capriscus	1	4.7713e-05	2160
Actinopterygii	Tetraodontiformes	Balistidae	Xanthichthys	mento	1	6.94561e-05	270
Actinopterygii	Tetraodontiformes	Molidae	Mola	mola	1	0.00115035	369260
Actinopterygii	Tetraodontiformes	Monacanthidae	Nelusetta	ayraud	1	0.000113098	10000
Actinopterygii	Tetraodontiformes	Monacanthidae	Oxymonacanthus	longirostris	1	0.000179595	17.28
Actinopterygii	Tetraodontiformes	Monacanthidae	Paramonacanthus	japonicus	1	9.19525e-05	17.28
Actinopterygii	Tetraodontiformes	Ostraciidae	Acanthostracion	quadricornis	1	0.000153633	1663.75
Actinopterygii	Tetraodontiformes	Tetraodontidae	Canthigaster	valentini	1	0.000179595	13.31
Actinopterygii	Zeiformes	Zeidae	Zenopsis	nebulosa	1	0.0041888	3430
Elasmobranchii	Carcharhiniformes	Carcharhinidae	Carcharhinus	acronotus	1	851.84	80000
Elasmobranchii	Carcharhiniformes	Carcharhinidae	Carcharhinus	albimarginatus	1	2810.11	270000
Elasmobranchii	Carcharhiniformes	Carcharhinidae	Carcharhinus	altimus	1	5120	270000
Elasmobranchii	Carcharhiniformes	Carcharhinidae	Carcharhinus	amblyrhynchoides	1	1663.75	44109.4
Elasmobranchii	Carcharhiniformes	Carcharhinidae	Carcharhinus	amblyrhynchos	1	1447.03	97318.1
Elasmobranchii	Carcharhiniformes	Carcharhinidae	Carcharhinus	brevipinna	1	4218.75	270000
Elasmobranchii	Carcharhiniformes	Carcharhinidae	Carcharhinus	cautus	1	506.53	33750
Elasmobranchii	Carcharhiniformes	Carcharhinidae	Carcharhinus	dussumieri	1	593.19	9513.12
Elasmobranchii	Carcharhiniformes	Carcharhinidae	Carcharhinus	falciformis	1	3810.78	428750
Elasmobranchii	Carcharhiniformes	Carcharhinidae	Carcharhinus	galapagensis	1	3214.19	506530
Elasmobranchii	Carcharhiniformes	Carcharhinidae	Carcharhinus	isodon	1	1901.09	68590
Elasmobranchii	Carcharhiniformes	Carcharhinidae	Carcharhinus	longimanus	1	2441.41	640000
Elasmobranchii	Carcharhiniformes	Carcharhinidae	Carcharhinus	macloti	1	1071.72	13310
Elasmobranchii	Carcharhiniformes	Carcharhinidae	Carcharhinus	perezii	1	3890.17	263306
Elasmobranchii	Carcharhiniformes	Carcharhinidae	Carcharhinus	sealei	1	593.19	7863.3
Elasmobranchii	Carcharhiniformes	Carcharhinidae	Carcharhinus	signatus	1	2160	219520
Elasmobranchii	Carcharhiniformes	Carcharhinidae	Loxodon	macrorhinus	1	714.734	9411.92
Elasmobranchii	Carcharhiniformes	Carcharhinidae	Nasolamia	velox	1	1488.77	33750
Elasmobranchii	Carcharhiniformes	Carcharhinidae	Rhizoprionodon	lalandii	1	375.954	4565.33
Elasmobranchii	Carcharhiniformes	Carcharhinidae	Rhizoprionodon	longurio	1	375.954	22999.7
Elasmobranchii	Carcharhiniformes	Carcharhinidae	Rhizoprionodon	oligolinx	1	129.779	3430
Elasmobranchii	Carcharhiniformes	Carcharhinidae	Triaenodon	obesus	1	1756.16	96636
Elasmobranchii	Carcharhiniformes	Proscylliidae	Eridacnis	barbouri	1	10	80000
Elasmobranchii	Carcharhiniformes	Proscylliidae	Eridacnis	radcliffei	1	13.31	129.779
Elasmobranchii	Carcharhiniformes	Proscylliidae	Eridacnis	sinuans	1	40.96	506.53
Elasmobranchii	Carcharhiniformes	Pseudotriakidae	Pseudotriakis	microdon	1	11576.2	224258
Elasmobranchii	Carcharhiniformes	Scyliorhinidae	Cephalurus	cephalus	1	10	219.52
Elasmobranchii	Carcharhiniformes	Scyliorhinidae	Scyliorhinus	capensis	1	297.91	18158.5
Elasmobranchii	Carcharhiniformes	Scyliorhinidae	Scyliorhinus	haeckelii	1	15.2088	1704.92
Elasmobranchii	Carcharhiniformes	Scyliorhinidae	Scyliorhinus	retifer	1	10	1071.72
Elasmobranchii	Carcharhiniformes	Scyliorhinidae	Scyliorhinus	stellaris	1	12.423	49130
Elasmobranchii	Carcharhiniformes	Scyliorhinidae	Scyliorhinus	stellaris	1	40.96	49130
Elasmobranchii	Carcharhiniformes	Scyliorhinidae	Scyliorhinus	torazame	1	5.12	1250
Elasmobranchii	Carcharhiniformes	Sphyrnidae	Sphyrna	corona	1	121.67	7786.88
Elasmobranchii	Carcharhiniformes	Sphyrnidae	Sphyrna	couardi	1	297.91	270000
Elasmobranchii	Carcharhiniformes	Sphyrnidae	Sphyrna	media	1	393.04	33750
Elasmobranchii	Carcharhiniformes	Sphyrnidae	Sphyrna	tudes	1	270	28032.2
Elasmobranchii	Carcharhiniformes	Triakidae	Furgaleus	macki	1	80	40960
Elasmobranchii	Carcharhiniformes	Triakidae	Galeorhinus	galeus	1	428.75	73013.8
Elasmobranchii	Carcharhiniformes	Triakidae	Mustelus	fasciatus	1	80	33750
Elasmobranchii	Carcharhiniformes	Triakidae	Mustelus	griseus	1	219.52	8305.84
Elasmobranchii	Carcharhiniformes	Triakidae	Mustelus	henlei	1	80	10000
Elasmobranchii	Carcharhiniformes	Triakidae	Mustelus	mustelus	1	593.19	80000
Elasmobranchii	Heterodontiformes	Heterodontidae	Heterodontus	galeatus	1	49.13	35118.1
Elasmobranchii	Heterodontiformes	Heterodontidae	Heterodontus	japonicus	1	58.32	17280
Elasmobranchii	Heterodontiformes	Heterodontidae	Heterodontus	portusjacksoni	1	129.779	44921.2
Elasmobranchii	Heterodontiformes	Heterodontidae	Heterodontus	quoyi	1	49.13	12250.4
Elasmobranchii	Hexanchiformes	Chlamydoselachidae	Chlamydoselachus	anguineus	1	1663.75	80000
Elasmobranchii	Hexanchiformes	Hexanchidae	Heptranchias	perlo	1	156.25	26567.4
Elasmobranchii	Hexanchiformes	Hexanchidae	Hexanchus	griseus	1	3075.47	1.1198e+06
Elasmobranchii	Hexanchiformes	Hexanchidae	Hexanchus	nakamurai	1	795.07	58320
Elasmobranchii	Lamniformes	Alopiidae	Alopias	pelagicus	1	29242.1	666765
Elasmobranchii	Lamniformes	Alopiidae	Alopias	superciliosus	1	6141.25	1.16203e+06
Elasmobranchii	Lamniformes	Alopiidae	Alopias	vulpinus	1	22999.7	1.767e+06
Elasmobranchii	Lamniformes	Cetorhinidae	Cetorhinus	maximus	1	40960	19531250
Elasmobranchii	Lamniformes	Lamnidae	Isurus	oxyrinchus	1	2746.25	881211
Elasmobranchii	Lamniformes	Lamnidae	Isurus	paucus	1	9126.73	751514
Elasmobranchii	Lamniformes	Lamnidae	Lamna	nasus	1	3075.47	428750
Elasmobranchii	Lamniformes	Odontaspididae	Carcharias	taurus	1	10000	359370
Elasmobranchii	Lamniformes	Odontaspididae	Odontaspis	ferox	1	10768.9	911250
Elasmobranchii	Lamniformes	Pseudocarchariidae	Pseudocarcharias	kamoharai	1	714.734	15609
Elasmobranchii	Myliobatiformes	Dasyatidae	Neotrygon	kuhlii	1	28.9364	3430
Elasmobranchii	Myliobatiformes	Myliobatidae	Manta	alfredi	1	27440	1250000
Elasmobranchii	Orectolobiformes	Brachaeluridae	Brachaelurus	waddi	1	44.9213	18158.5
Elasmobranchii	Orectolobiformes	Ginglymostomatidae	Nebrius	ferrugineus	1	1250	327680
Elasmobranchii	Orectolobiformes	Orectolobidae	Orectolobus	maculatus	1	92.61	327680
Elasmobranchii	Orectolobiformes	Orectolobidae	Orectolobus	ornatus	1	80	243890
Elasmobranchii	Orectolobiformes	Orectolobidae	Sutorectus	tentaculatus	1	58.32	7786.88
Elasmobranchii	Pristiophoriformes	Pristiophoridae	Pliotrema	warreni	1	428.75	49130
Elasmobranchii	Pristiophoriformes	Pristiophoridae	Pristiophorus	cirratus	1	327.68	25713.5
Elasmobranchii	Pristiophoriformes	Pristiophoridae	Pristiophorus	nudipinnis	1	219.52	18158.5
Elasmobranchii	Rajiformes	Rhinobatidae	Rhinobatos	percellens	1	80	10000
Elasmobranchii	Squaliformes	Centrophoridae	Centrophorus	squamosus	1	911.25	44109.4
Elasmobranchii	Squaliformes	Dalatiidae	Dalatias	licha	1	466.56	60285.7
Elasmobranchii	Squaliformes	Dalatiidae	Euprotomicrus	bispinatus	1	5.12	283.726
Elasmobranchii	Squaliformes	Echinorhinidae	Echinorhinus	brucus	1	2106.45	297910
Elasmobranchii	Squaliformes	Echinorhinidae	Echinorhinus	cookei	1	767.656	640000
Elasmobranchii	Squaliformes	Etmopteridae	Aculeola	nigra	1	24.6038	2160
Elasmobranchii	Squaliformes	Etmopteridae	Etmopterus	granulosus	1	58.32	2160
Elasmobranchii	Squaliformes	Etmopteridae	Etmopterus	hillianus	1	7.29	1250
Elasmobranchii	Squaliformes	Etmopteridae	Etmopterus	molleri	1	33.75	973.36
Elasmobranchii	Squaliformes	Etmopteridae	Etmopterus	sculptus	1	33.75	220.109
Elasmobranchii	Squaliformes	Etmopteridae	Etmopterus	spinax	1	21.97	2160
Elasmobranchii	Squaliformes	Oxynotidae	Oxynotus	bruniensis	1	10	2874.96
Elasmobranchii	Squaliformes	Oxynotidae	Oxynotus	paradoxus	1	156.25	17280
Elasmobranchii	Squaliformes	Somniosidae	Centroscymnus	coelolepis	1	44.9213	17280
Elasmobranchii	Squaliformes	Somniosidae	Centroscymnus	crepidater	1	283.726	21970
Elasmobranchii	Squaliformes	Somniosidae	Centroscymnus	owstonii	1	231.491	17715.6
Elasmobranchii	Squaliformes	Somniosidae	Centroscymnus	plunketi	1	393.04	34088.6
Elasmobranchii	Squaliformes	Somniosidae	Somniosus	pacificus	1	740.88	823129
Elasmobranchii	Squaliformes	Somniosidae	Somniosus	rostratus	1	147.061	29242.1
Elasmobranchii	Squaliformes	Squalidae	Cirrhigaleus	asper	1	186.096	16222.3
Elasmobranchii	Squaliformes	Squalidae	Squalus	megalops	1	106.48	5216.6
Elasmobranchii	Squaliformes	Squalidae	Squalus	mitsukurii	1	138.24	7799.58
Elasmobranchii	Squaliformes	Squalidae	Squalus	rancureli	1	138.24	4565.33
Elasmobranchii	Squatiniformes	Squatinidae	Squatina	africana	1	297.91	8305.84
Elasmobranchii	Squatiniformes	Squatinidae	Squatina	oculata	1	165.814	40960
Elasmobranchii	Squatiniformes	Squatinidae	Squatina	punctata	1	175.76	7049.69
Holocephali	Chimaeriformes	Chimaeridae	Chimaera	monstrosa	1	10	33750
Holocephali	Chimaeriformes	Chimaeridae	Hydrolagus	novaezealandiae	1	11.5762	8847.36
Holocephali	Chimaeriformes	Rhinochimaeridae	Harriotta	raleighana	1	15.2088	13768.9
Holocephali	Chimaeriformes	Rhinochimaeridae	Neoharriotta	pinnata	1	1569.98	21970
Myxini	Myxiniformes	Myxinidae	Eptatretus	deani	1	0.06545	2560.48
Myxini	Myxiniformes	Myxinidae	Eptatretus	stoutii	1	0.06545	2560.48
Sarcopterygii	Coelacanthiformes	Latimeriidae	Latimeria	chalumnae	1	294.01	62295
